# Supplementary material
Source: PubMed Central journal article supplement (PMC2810249)

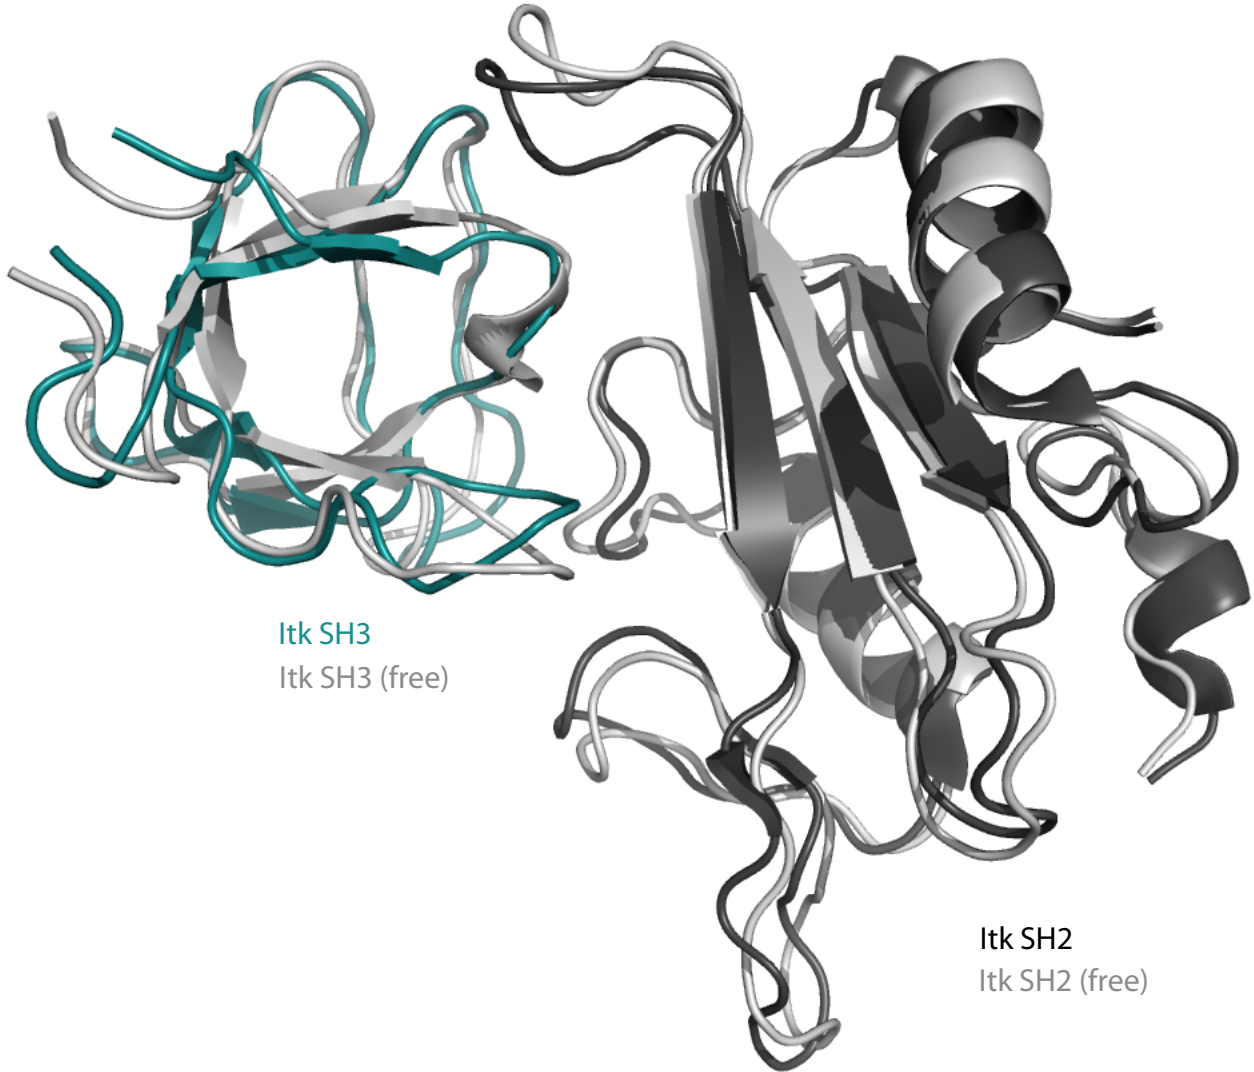

Itk SH3  
Itk SH3 (free)

Itk SH2  
Itk SH2 (free)

Supplement: NIHMS96402-supplement-01.pdf [file NIHMS96402-supplement-01.pdf]

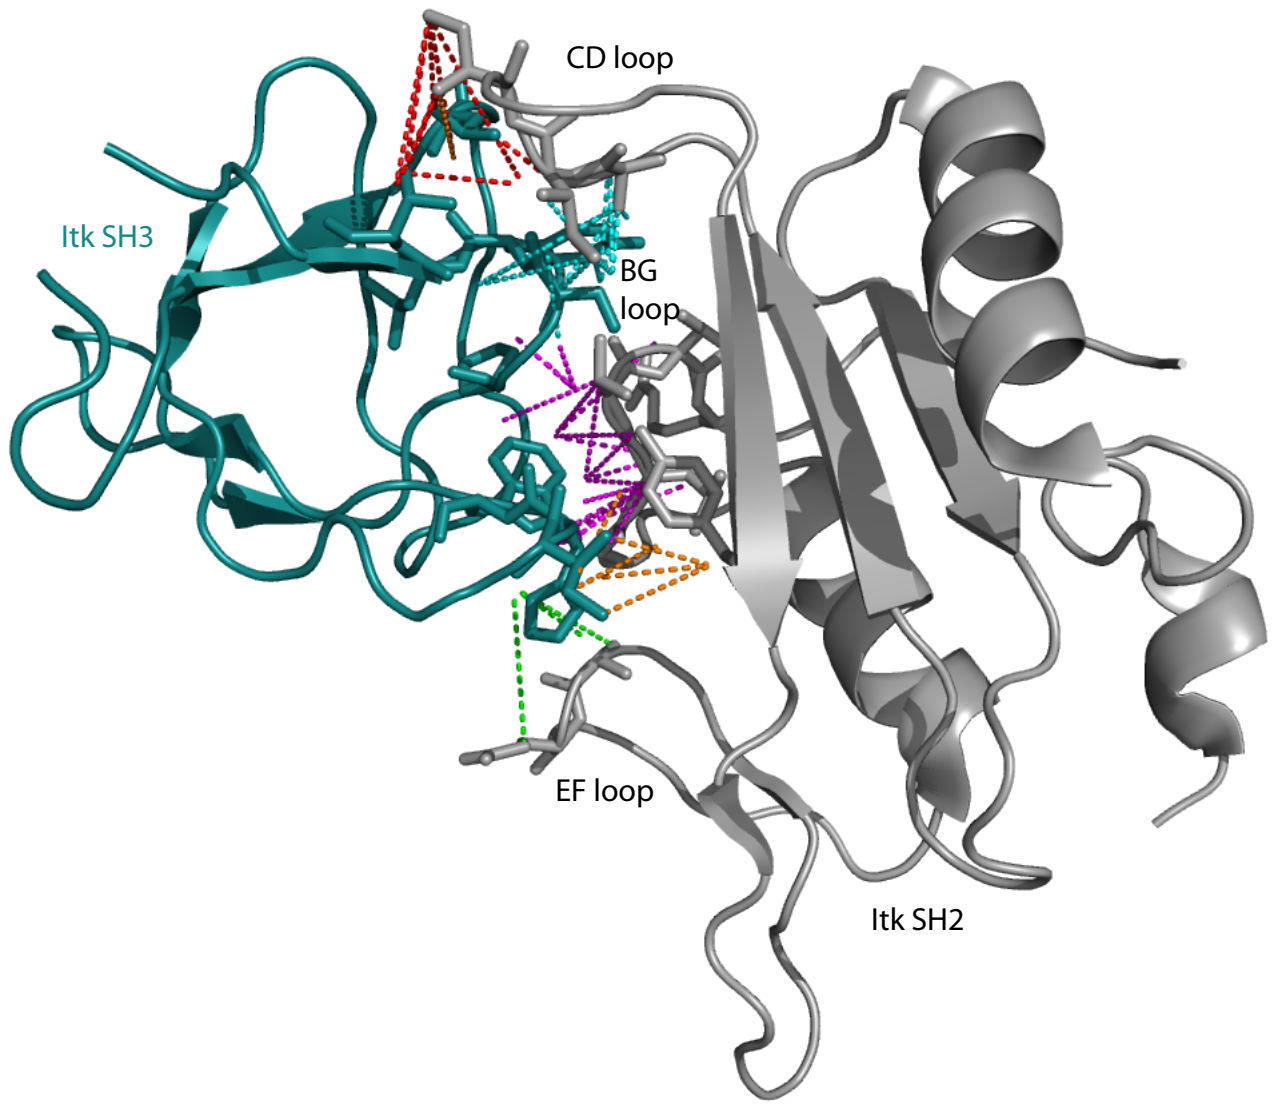

Supplement: NIHMS96402-supplement-02.pdf [file NIHMS96402-supplement-02.pdf]
